# Supplementary material for: The immunoenhancement effects of sea buckthorn pulp oil in cyclophosphamide-induced immunosuppressed mice
Source: Royal Society of Chemistry journal article supplement (doi:10.1039/d1fo01257f), 2021-01-01
Supplement: d1fo01257f1.pdf [file d1fo01257f1.pdf]

**Table S1** Fatty acids of SBT pulp oil.

|                              | SBT pulp oil  |
|------------------------------|---------------|
| <b>Fatty acid (%)</b>        |               |
| 12:0                         | 0.07±0.00     |
| 14:0                         | 0.50±0.02     |
| 16:0                         | 19.68±0.11    |
| 18:0                         | 5.83±0.05     |
| 18:1n9t                      | 0.07±0.00     |
| 18:1n9c                      | 15.66±0.05    |
| 18:2n6t                      | 0.09±0.00     |
| 18:2n6c                      | 49.56±0.25    |
| 18:3n3                       | 2.69±0.05     |
| 20:0                         | 1.28±0.02     |
| 20:1n9                       | 0.28±0.01     |
| 22:0                         | 0.60±0.03     |
| 24:0                         | 0.36±0.04     |
| Total SFA                    | 24.12±0.15    |
| Total MUFA                   | 16.84±0.06    |
| Total PUFA                   | 53.68±0.17    |
| Total UFA                    | 70.52±0.27    |
| Phytosterol (mg/kg)          | 559.03±6.18   |
| Vegetable oil sterol (mg/kg) | 220.52±3.01   |
| β-sitosterol (mg/kg)         | 6033.02±13.23 |

Data are expressed as the mean ± SD.
